# Supplementary material for: Interlimb differences in gait kinematics, kinetics, and muscle activation during walking and running one year after acute unilateral Achilles tendon rupture
Source: Research Square preprint supplement (doi:10.21203/rs.3.rs-6915036/v1), 2025-06-20
Supplement: Supplementary file 1 [file c5571842b45c708e313fcc16.docx]

**Table 1** Participant demographics and patient reported outcome measurements score (mean (±SD))

| Age (years) | 47.4 (± 9.4) |
| --- | --- |
| Height (meter) | 1.79 (± 0.08) |
| Weight (kg) | 83.3 (± 16.6) |
| BMI* | 26.9 (±4.9) |
| PAS** | 4 (± 1.1) |
| EQ-5D*** | 0.7 (± 0.3) |

* BMI = Body mass index; **PAS= Physical activity scale (six-graded scale), self-reported level of physical activity (1 denoting extremely low physical activity and 6 denoting strenuous physical activity); *** EQ-5D self-reported score **health-related quality of life (range 1- (-0.43), 1= perfect health. -0.43 = worse than death.**

**Table 2.** Marker placement for the present 6 degree of freedom model

| Anatomical segments | Anatomical markes | Tracking markers |
| --- | --- | --- |
| Foot/ankle complex | Distal metatarsal I | Distal metatarsal III |
|  | Distal metatarsal V | Lateral calcaneus |
|  | Medial malleolus | Inferior heel |
|  | Lateral malleolus | Superior heel |
| Lower leg | Medial tibial condyles | Shank cluster (4x) |
|  | Lateral tibial condyle |  |
| Thigh | Medial femoral condyles | Thigh cluster (4x) |
|  | Lateral femoral condyle |  |
|  | Greater trochanter |  |
| Pelvis | Iliac crest | Anterior superior iliac spine |
|  |  | Posterior superior iliac spine  Superior sacrum |
| Trunk | Acromion | T10 spinal process |
|  |  | Inferior scapular angle |
|  |  | Head of sternum |
|  |  | C7 spinal process |

**Table 3**. EMG recording in selected lower limb muscles, electrodes positionings

| Muscle | Electrode Placements |
| --- | --- |
| Medial Gastrocnemius | 2 cm apart, parallel to muscle fibers, just distally to the knee, 2 cm medially to the midline of the dorsal aspect of the shank |
| Lateral Gastrocnemius | 2 cm apart, parallel to muscle fibers, just distal to knee and 2 cm lateral to midline of the dorsal aspect of the shank |
| Medial Soleus | Medially to the Achilles tendon, just below the distal border of medial gastrocnemius. |
| Tibialis anterior | One-third or one-fourth down the length of the tibia, and Lateral to the tibia, over the greatest muscle mass. |

**Table 4.** Variables used in the statistical model analyzing side to side differences in affected and unaffected limbs

| Modalities | Presented as | Stance periods | Muscles/Planes |
| --- | --- | --- | --- |
| EMG | mean %MVIC | IC-MS/MS-TO | anterior tibialis (TA)  medial gastrocnemius (GM)  lateral gastrocnemius (GL)  soleus (SOL) |
| KINEMATICS | mean ROM  in degrees | IC-MS /MS-TO | SAGITTAL PLANE for ankle, knee, hip  FRONTAL PLANE for ankle, knee, hip |
| KINETICS | mean joint moment  in Nm/kg | IC-MS/MS-TO | SAGITTAL PLANE for ankle, knee, hip  FRONTAL PLANE for ankle, knee, hip |

Defined periods of gait stance phase: IC-MS: initial contact to midstance, MS-TO: midstance to toe off. EMG: electromyography, MVIC: maximum voluntary isometric contraction, ROM: range of motion.

**Table 5.** Descriptive EMG data from affected and unaffected limbs during waking and running (n= 37)a

| **EMG** |  |  |  |  |  |  | **MUSCLES** |  |
| --- | --- | --- | --- | --- | --- | --- | --- | --- |
| LOCOMATION  MODE | TIBIALIS ANTERIOR | TIBIALIS ANTERIOR | MEDIAL  GASTROC | MEDIAL GASTROC | LATERAL GASTROC | LATERAL GASTROC | SOLEUS | SOLEUS |
| WALK | AFFECTED | UNAFFECTED | AFFECTED | UNAFFECTED | AFFECTED | UNAFFECTED | AFFECTED | UNAFFECTED |
| IC-MS | 10.45  (± 6.78) | 11.47  (±6.08) | 12.85*  (±7.34) | 10.95  (±8.00) | 8.58*  (±5.86) | 6.78  (±3.53) | 6.78  (±3.53) | 19.28  (±9.62) |
| MS-TO | 6,16  (±4.99) | 6,55  (±6.00) | 21.37*  (±9.54) | 19.19  (±11.02) | 19.40  (±10.83) | 15.62  (±6.65) | 33.00  (±14.93) | 32.88  (±17.60) |
| RUN | AFFECTED | UNAFFECTED | AFFECTED | UNAFFECTED | AFFECTED | UNAFFECTED | AFFECTED | UNAFFECTED |
| IC-MS | 19.62  (±26.14) | 17.75  (±13.34) | 53.85  (±26.11) | 53.82  (±31.31) | 53.35  (±24.57) | 51,97  (±22.80) | 78,38  (±42.94) | 80.90  (±44.50) |
| MS-TO | 11.52  (±10.73) | 11.36  (±8.87) | 28.97  (±15.67) | 33.83  (±19.39) | 29.10  (±18.80) | 29,45  (±14.14) | 39,91  (±22.95) | 49.27  (±41.65) |

aData are presented as mean (± SD) % MVIC EMG. IC-MS: initial contact to midstance, MS-TO: midstance to toe off. * affected vs. non-affected limb.

**Table 6.** Descriptive kinematic data (joint angle ROM) measured in affected and unaffected limb during walking and running (n=37)a

| KINEMATICS |  | JOINT RANGE OF MOTION |  |  |  |  |  |  |  |  |
| --- | --- | --- | --- | --- | --- | --- | --- | --- | --- | --- |
| LOCOMATION  MODE | ANKLE  SAGITTAL | ANKLE  SAGITTAL | ANKLE  FRONTAL | ANKLE  FRONTAL | KNEE  SAGITTAL | KNEE  SAGITTAL | HIP  SAGITTAL | HIP  SAGITTAL | HIP  FRONTAL | HIP  FRONTAL |
| WALK | AFFECTED | UNAFFECTED | AFFECTED | UNAFFECTED | AFFECTED | UNAFFECTED | AFFECTED | UNAFFECTED | AFFECTED | UNAFFECTED |
| IC-MS | 13.3  (±2.0) | 12.7  (± 2.0) | 6.6  (± 2.5) | 7.4  (± 2.4) | 15.1  (± 3.9) | 16.1  (± 3.0) | 28.6  (± 3.2) | 28.6  (± 4.1) | 7.7  (± 2.9) | 7.6  (± 2.4) |
| MS-TO | 24.7*  (± 3.6) | 26.5  (± 3.4) | 7.3  (± 2.1) | 7.8  (± 2.7) | 43.6  (± 3.9) | 42.8  (± 3.4) | 15.5  (± 3.2) | 14.7  (± 3.3) | 12.3  (± 2.6) | 12.2  (± 2.8) |
| RUN | AFFECTED | UNAFFECTED | AFFECTED | UNAFFECTED | AFFECTED | UNAFFECTED | AFFECTED | UNAFFECTED | AFFECTED | UNAFFECTED |
| IC-MS | 16.8  (± 2.8) | 16.6  (± 2.7) | 10.6  (± 3.7) | 12.0  (± 3.9) | 27.5  (± 5.5) | 27.1  (± 4.3) | 10.1  (± 4.8) | 10.5  (± 4.5) | 5.0  (± 2.4) | 4.6  (± 2.6) |
| MS-TO | 38.3*  (± 6.3) | 42.3  (± 5.0) | 8.0  ( ± 3.1) | 8.9  (± 3.5) | 22.4  (± 5.0) | 21.7  (± 5.8) | 28.0  (±6.6) | 28.2  (± 6.1) | 8.7  (± 4.2) | 9.8  (± 3.7) |

aData are presented as mean (± SD) in degrees. IC-MS: initial contact to midstance, MS-TO: midstance to toe off. * affected vs. non-affected limb.

**Table 7.** Descriptive kinetic data (net joint moments) obtained in affected and unaffected limbs during walking and running (n=37)a

| KINETICS |  |  | JOINT MOMENT |  |  |  |  |  |  |  |
| --- | --- | --- | --- | --- | --- | --- | --- | --- | --- | --- |
| LOCOMATION  MODE | ANKLE  SAGITTAL | ANKLE  SAGITTAL | ANKLE  FRONTAL | ANKLE  FRONTAL | KNEE  SAGITTAL | KNEE  SAGITTAL | HIP  SAGITTAL | HIP  SAGITTAL | HIP  FRONTAL | HIP  FRONTAL |
| WALK | AFFECTED | UNAFFECTED | AFFECTED | UNAFFECTED | AFFECTED | UNAFFECTED | AFFECTED | UNAFFECTED | AFFECTED | UNAFFECTED |
| IC-MS | -0.09 (±0.12) | -0.11  (±0.10) | 0.02  (±0.08) | 0.01  (±0.09) | -0.36 (±0.13) | -0.38  (±0.12) | -0.51  (±0.17) | -0.50  (±0.18) | -0.51 (±0.22) | -0.48  (±0.15) |
| MS-TO | -0.97 (±0.11) | -0.98  (±0.09) | 0.05  (±0.04) | 0.04  (±0.05) | -0.05  (± 0.11) | -0.03  (± 0.11) | -0.33  (±0.16) | 0.31  (±0.18) | 0.33  (±0.14) | 0.31  (±0.12) |
| RUN | AFFECTED | UNAFFECTED | AFFECTED | UNAFFECTED | AFFECTED | UNAFFECTED | AFFECTED | UNAFFECTED | AFFECTED | UNAFFECTED |
| IC-MS | -0.79  (± 0.25) | -0.79  (±0.26) | 0.08  (±0.11) | 0.08  (±0.12) | -1.25  (±0.23) | -1.28  (±0.22) | -0.93  (±0.33) | -0.93  (±0.45) | -0.65 (±0.19) | -.070  (±0.25) |
| MS-TO | -1.30*  (±0.25) | -1.36  (±0.24) | 0.17  (±0.09) | 0.16  (±0.09) | -0.50 (±0.21) | -0.51  (±0.19) | 0.12  (±0.21) | 0.05  (±0.26) | 0.12  (±0.30) | 0.05  (±0.33) |

aData are presented as mean (± SD) in Nm/kg. IC-MS: initial contact to midstance, MS-TO: midstance to toe off. * affected vs. non-affected limb.

Sagittal moment positive and negative signs for ankle: + dorsiflexion moment, - plantar flexion moment, knee: + flexion moment, - extension moment, hip: + flexion moment, - extension moment.
